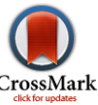

# Energy-Based Wavelet De-Noising of Hydrologic Time Series

Yan-Fang Sang<sup>1,2\*</sup>, Changming Liu<sup>1</sup>, Zhonggen Wang<sup>1</sup>, Jun Wen<sup>2</sup>, Lunyu Shang<sup>2</sup>

**1** Key Laboratory of Water Cycle & Related Land Surface Processes, Institute of Geographic Sciences and Natural Resources Research, Chinese Academy of Sciences, Beijing, China, **2** Key Laboratory of Land Surface Process and Climate Change in Cold and Arid Regions, Chinese Academy of Sciences, Lanzhou, China

## Abstract

De-noising is a substantial issue in hydrologic time series analysis, but it is a difficult task due to the defect of methods. In this paper an energy-based wavelet de-noising method was proposed. It is to remove noise by comparing energy distribution of series with the background energy distribution, which is established from Monte-Carlo test. Differing from wavelet threshold de-noising (WTD) method with the basis of wavelet coefficient thresholding, the proposed method is based on energy distribution of series. It can distinguish noise from deterministic components in series, and uncertainty of de-noising result can be quantitatively estimated using proper confidence interval, but WTD method cannot do this. Analysis of both synthetic and observed series verified the comparable power of the proposed method and WTD, but de-noising process by the former is more easily operable. The results also indicate the influences of three key factors (wavelet choice, decomposition level choice and noise content) on wavelet de-noising. Wavelet should be carefully chosen when using the proposed method. The suitable decomposition level for wavelet de-noising should correspond to series' deterministic sub-signal which has the smallest temporal scale. If too much noise is included in a series, accurate de-noising result cannot be obtained by the proposed method or WTD, but the series would show pure random but not autocorrelation characters, so de-noising is no longer needed.

**Citation:** Sang Y-F, Liu C, Wang Z, Wen J, Shang L (2014) Energy-Based Wavelet De-Noising of Hydrologic Time Series. PLoS ONE 9(10): e110733. doi:10.1371/journal.pone.0110733

**Editor:** Alejandro Raul Hernandez Montoya, Universidad Veracruzana, Mexico

**Received:** April 12, 2014; **Accepted:** September 16, 2014; **Published:** October 31, 2014

**Copyright:** © 2014 Sang et al. This is an open-access article distributed under the terms of the Creative Commons Attribution License, which permits unrestricted use, distribution, and reproduction in any medium, provided the original author and source are credited.

**Data Availability:** The authors confirm that all data underlying the findings are fully available without restriction. All relevant data are within the paper.

**Funding:** The Strategic Priority Research Program of the Chinese Academy of Sciences (No. XDB03030202), the National Natural Science Foundation of China (NSFC) (No. 41201036 and 41330529), and the Opening Fund of Key Laboratory of Land Surface Process and Climate Change in Cold and Arid Regions (No. LPCC201203) provided funding for this work. The funders had no role in study design, data collection and analysis, decision to publish, or preparation of the manuscript.

**Competing Interests:** The authors have declared that no competing interests exist.

\* Email: sangyf@igsnr.ac.cn

## Introduction

Hydrologic process in nature shows complex variability due to the influence of many, often interrelated, physical factors [1] – [2], especially those random and uncertain factors [3] – [4]. Hydrologic time series are the comprehensive reaction of hydrologic process. Therefore, hydrologic time series analysis is always the central topic in stochastic hydrology [5] – [6]. It is to reveal the variability of hydrologic processes, and provide useful information for water activities. In the theory of stochastic hydrology [7], noise is an inevitable component of observed hydrologic data, and it will cause many difficulties in hydrologic series analysis [8] – [9]. Also because of the influence of noise, hydrologic forecasting usually has uncertainty [10] – [11], based on which many hydrologic designs and water resources planning will have risks [12] – [13]. Therefore, de-noising is a required task in hydrologic time series analysis. However, it is a difficult task in practice due to complex composition of hydrologic data and methods' disadvantages.

Presently, there have been a great number of de-noising methods with various theoretical bases. Among them, traditional de-noising methods are mainly based on model simulation or spectral analysis. They are suitable for stationary and linear systems, and depend on the establishment of state space functions

[14] – [15], by which accurate de-noising result usually cannot be obtained. Comparatively, wavelet threshold de-noising (WTD) method performs better [16], because it can reveal the localized characteristics of a series both in temporal and frequency domains [17] – [18]. Details of the mathematical fundament of WTD can be found in the literature [19]. Present studies and applications of WTD were reviewed in the literature [9]. However, many key factors influence the efficiency of WTD, including wavelet and decomposition level choice, threshold estimation and coefficient thresholding [20]. De-noising process by WTD is onerous and time-consuming sometimes. Thereby, more effective and easy-to-operate de-noising methods are needed.

By exploiting the advantage of wavelet analysis, the main objective of this paper is to propose an energy-based wavelet de-noising method. A series can be decomposed into a set of sub-signals by discrete wavelet transform (DWT). The variation of energy (*i.e.*, variance) of sub-signal with decomposition level is called “energy distribution” of series in this paper. Energy distributions of hydrologic series and noise were compared by considering uncertainty, based on which an energy-based wavelet de-noising method was proposed. Analyses of many examples indicate the superiority and simplicity of the proposed method compared with WTD. The rest content is organized as follows. Section 2 briefly describes wavelet method. Section 3 estimates

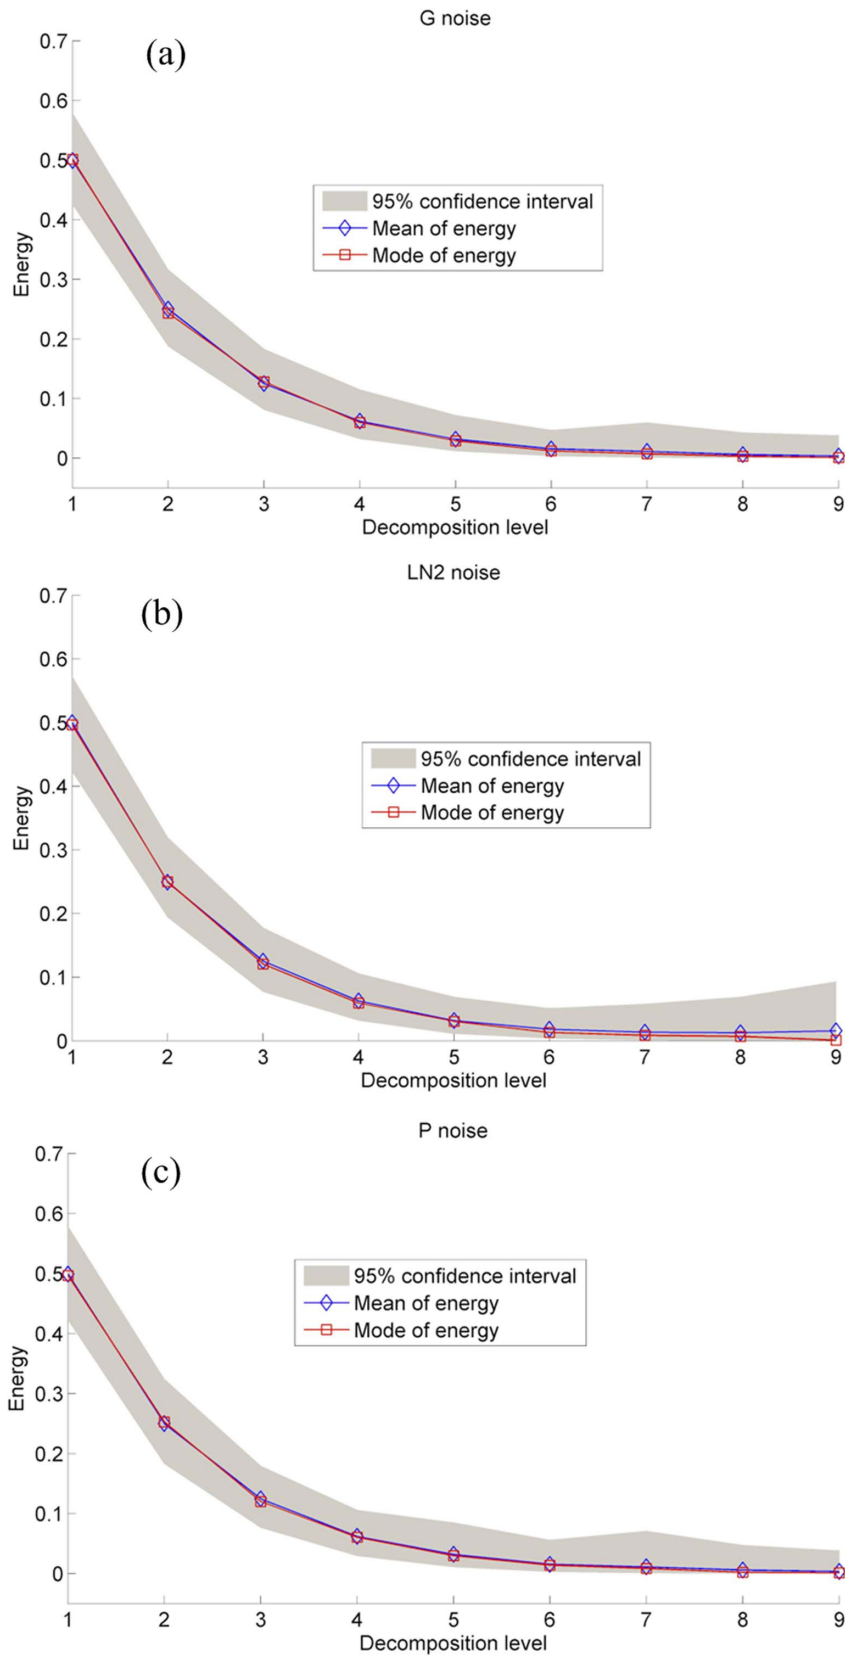

**Figure 1. Energy distributions of the gauss (G) (a), 2-parameter lognormal (LN2) (b), and Pearson-III (P) (c) distributed noise with 95% confidence interval.**  
 doi:10.1371/journal.pone.01110733.g001

energy distribution of noise by operating Monte-Carlo test, based on which Section 4 proposes an energy-based wavelet de-noising method. Section 5 investigates the influences of three key factors on the efficiency of the proposed method. Section 6 discusses the results, and gives several suggestions for improving wavelet de-noising. The study is summarized in the final section.

**Wavelet Transform**

Given proper mother wavelet  $\psi(t)$ , continuous wavelet transform (CWT) of a series  $f(t)$  can be conducted as [18]:

$$W_f(a,b) = \int_{-\infty}^{+\infty} f(t)\psi_{a,b}^*(t)dt \quad \text{with} \quad (1)$$

$$\psi_{a,b}(t) = \frac{1}{\sqrt{a}}\psi\left(\frac{t-b}{a}\right), \quad b \in \mathbb{R}, \quad a \neq 0$$

in which  $\psi^*(t)$  is the complex conjugate;  $\psi_{a,b}(t)$  is gained by translating and expanding  $\psi(t)$ ;  $a$  is temporal scale factor and  $b$  is time position factor;  $W_f(a,b)$  is continuous wavelet coefficient. Observed hydrology series are more often discrete series, and they can be analyzed by DWT:

$$W_f(j,k) = \int_{-\infty}^{+\infty} f(t)\psi_{j,k}^*(t)dt \quad \text{with} \quad (2)$$

$$\psi_{j,k}(t) = a_0^{-j/2}\psi(a_0^{-j}t - kb_0)$$

where  $a_0$  ( $a_0 > 1$ ) and  $b_0$  are constants; integer  $j$  is decomposition level, and  $k$  is time position factor. The dyadic DWT is used commonly by assigning  $a_0 = 2$  and  $b_0 = 1$ . It consists of  $\log_2 n$  levels at most given the analyzed series has the length of  $n$ :

$$W_f(j,k) = \int_{-\infty}^{+\infty} f(t)\psi_{j,k}^*(t)dt \quad \text{with} \quad (3)$$

$$\psi_{j,k}(t) = 2^{-j/2}\psi(2^{-j}t - k)$$

More details of DWT were thoroughly described in [21] – [22]. The wavelet that satisfies regularity condition can be used to reconstruct series  $f(t)$  [23]:

$$f(t) = \sum_{j,k} W_f(j,k)\psi^*(a_0^{-j}t - kb_0) \quad (4)$$

Wavelet threshold de-noising is based on discrete wavelet result of series. It is to adjust detail wavelet coefficients:

$$W_f'(j,k) = \rho(W_f(j,k), T_j) \quad (5)$$

where  $\rho()$  is the thresholding rule, such as hard-, soft- and mid-thresholding rule,  $T_j$  is the threshold under level  $j$ , and  $W_f'(j,k)$  is the adjusted value of  $W_f(j,k)$ . De-noised series can be reconstructed by substituting  $W_f'(j,k)$  for  $W_f(j,k)$  in Eq. (4), and the residue is noise [19]. Wavelet threshold de-noising is influenced by four key factors [24]. The first two are wavelet and decomposition level choice, both determine the accuracy of DWT result in Eq. (2). The other two are threshold estimation and coefficient thresholding, both determine the accuracy of adjusted wavelet coefficients result in Eq. (5).

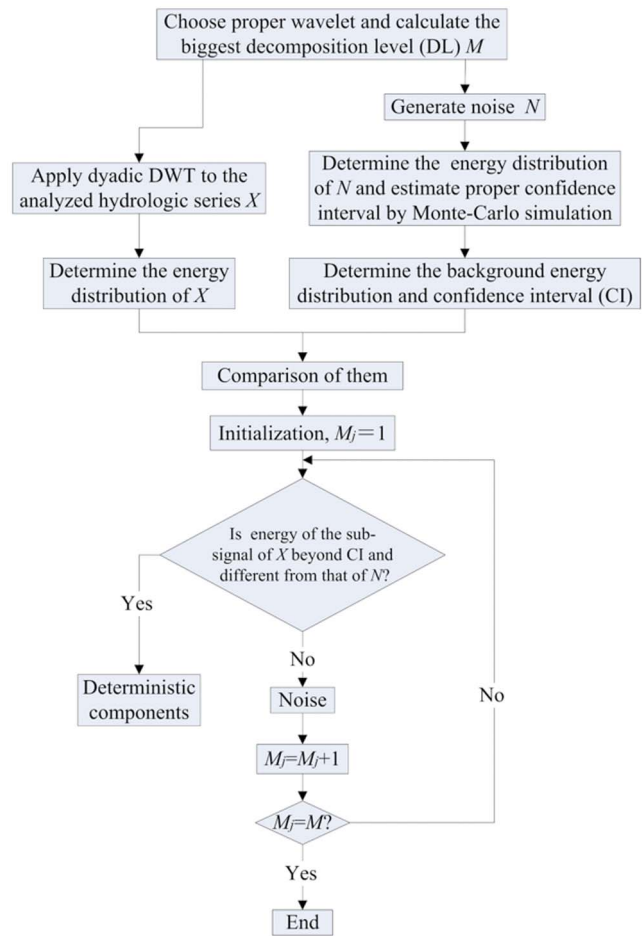

**Figure 2. De-noising process of hydrologic time series by the energy-based wavelet de-noising method proposed.**  
doi:10.1371/journal.pone.0110733.g002

**Energy Distribution of Noise**

In order to establish a reliable basis for wavelet de-noising, Monte-Carlo test is operated to estimate energy distribution of noise. Because probability distribution of noise in hydrologic data is generally unknown, the types of noise following Gauss, 2-parameter lognormal and Pearson-III distributions, G, LN2 and P for short, are analyzed for comparison. The following steps are used for Monte-Carlo test:

- (1) Generate noise data with the length of  $n$ , and the biggest decomposition level equals  $\log_2 n$ ;
- (2) Choose proper wavelet, apply dyadic DWT to the noise data using Eq. (3), and obtain detail wavelet coefficients under each decomposition level  $j$ ;
- (3) Reconstruct sub-signal  $f_j(t)$  of noise data under each level  $j$  by Eq. (4), and calculate its energy (i.e., variance)  $E(j)$ :

$$E(j) = \frac{1}{n} \sum_{t=1}^n (f_j(t))^2 \quad (6)$$

- (4) Repeat the steps 1–3 to obtain stable sampling result of Monte-Carlo test. Calculate arithmetic mean of energy of noise’s sub-signal under each level  $j$ , and estimate proper

**Table 1.** Data used in this paper\*.

| Type             | Data                          | Length | True components |                                     |
|------------------|-------------------------------|--------|-----------------|-------------------------------------|
| Synthetic series | Type-I                        | SS1    | 1500            | The same damped period              |
|                  |                               | SS12   | 1500            |                                     |
|                  |                               | SS13   | 1500            |                                     |
|                  |                               | SS14   | 1500            |                                     |
|                  | Type-II                       | SS2    | 500             | The same two periods of 50 and 200  |
|                  |                               | SS22   | 500             |                                     |
|                  |                               | SS23   | 500             | The same exponentially upward trend |
|                  |                               | SS24   | 500             |                                     |
| Observed series  | Daily temperature (1980–2001) | RS1    | 8036            | Annual period                       |
|                  | Monthly runoff (1972–2001)    | RS2    | 360             | 12 months                           |

\*: Four series in Type-I have no trend, but four series in Type-II have the same exponentially upward trend with the base of 1.005. These synthetic series include different contents of normally distributed noise (i.e., different true SNR values). The RS1 data were gained from the China Meteorological Data Sharing Service System (<http://cdc.cma.gov.cn/>). The RS2 data were gained from the Center for Water Resources Research, Chinese Academy of Sciences (<http://www.cwrr.cn/>). doi:10.1371/journal.pone.0110733.t001

confidence interval (e.g., 95%). The result is taken as energy distribution of noise.

The above steps are applied to three noise types, and the results are presented in Fig. 1. According to the study in the literature [25], “db5” wavelet is used to analyze these noise data with the same length of 1000. The sampling number of Monte-Carlo test is 50,000 to obtain stable sampling result. The results indicate that arithmetic mean of energy of noise’s sub-signal exponentially decreases with level, with the base of 2, and it is due to the grid of dyadic DWT [26] – [27]. Uncertainty can be estimated by determining 95% confidence interval. Arithmetic mean and mode values of energy of sub-signal under each level are the same, so the upper and lower limits of 95% confidence interval are symmetrical to arithmetic mean value. Consequently, energy distributions of three noise types (G, LN2 and P) are similar to each other. They strictly follow the exponentially decreasing rule with the base of 2. Therefore, it is thought that the shape of energy distribution of noise has no relation with noise type.

## Energy-Based Wavelet De-Noising Method Proposed

According to the theory of stochastic hydrology, hydrologic series data is basically composed of deterministic components and noise [7]. The former, mainly including periodicities and trend, are generated by certain physical deterministic mechanisms. Noise, whose existence contaminates true hydrologic data, is generated by many random and uncertain factors. When applying DWT to hydrologic data, energy distributions of the two components are different [28]. Energies of deterministic components concentrate on several decomposition levels, but energy of noise scatters in the whole temporal scales and rapidly decays with level, as displayed in Fig. 1.

Based on their difference of energy distribution, we use the energy distribution of noise to establish a reliable background energy distribution (as defined afterward), and de-noising can be done by comparing energy distribution of series with the background energy distribution. It is the basic idea of the wavelet de-noising method proposed here. Furthermore, we used the confidence interval, which can be estimated from the sampling

result of Monte-Carlo test, to evaluate uncertainty in the comparison process.

De-noising steps by the proposed method are explained as follows:

- (1) Choose proper wavelet, calculate the biggest decomposition level, and apply dyadic DWT to the analyzed series  $X$  using Eq. (3);
- (2) Determine the energy distribution of series  $X$  using Eq. (6);
- (3) Use proper probability density function to generate noise data  $N$ , whose length is the same as that of series  $X$ , then determine the energy distribution of noise data, and estimate proper confidence interval by operating Monte-Carlo test;
- (4) Set the sub-signal of series  $X$  under the first level as noise, and use its energy to adjust the energy distribution of noise data and estimated confidence interval. The result is defined as “background energy distribution” in this paper;
- (5) Compare the energy distribution of series  $X$  with the background energy distribution. Two cases would be encountered: (a) energy of sub-signal under certain level oversteps the confidence interval. The sub-signal should be a deterministic component; (b) energy of sub-signal under certain level falls within the confidence interval and is close to that of noise. In this case, the sub-signal more likely is composed of noise and should be removed from series  $X$ ;
- (6) Add up all those deterministic components and obtain the de-noised series, and take the residue as noise.

The above de-noising steps by the proposed method are also depicted in Fig. 2.

## Case Study

Both synthetic and observed series are used to verify the performance of the energy-based wavelet de-noising method proposed, and further to investigate the influences of three key factors on wavelet de-noising, including wavelet choice, decomposition level choice and noise content.

Considering that the superiority of WTD method compared with other conventional de-noising methods has been expounded in the literature [9], the latter are omitted here for brevity reason.

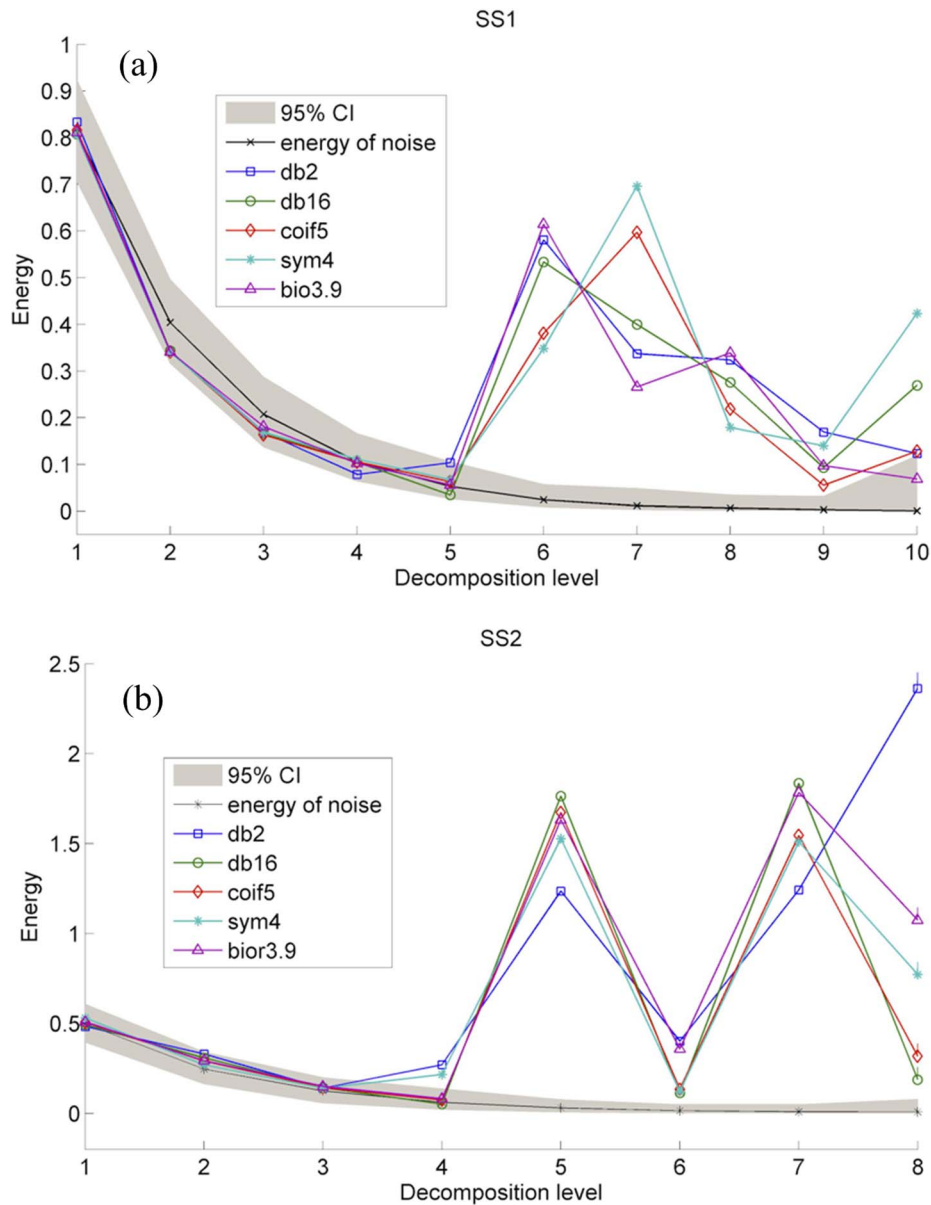

**Figure 3. Energy distributions of SS1 (a) and SS2 (b) series obtained by different wavelets.**  
doi:10.1371/journal.pone.0110733.g003

**Table 2. Evaluation of the de-noising results of SS1 and SS2 series obtained by different wavelets\*.**

| Series | Index**         | Wavelet used |              |        |        |               |
|--------|-----------------|--------------|--------------|--------|--------|---------------|
|        |                 | db2          | db16         | sym4   | coif5  | bior3.9       |
| SS1    | SNR (-0.096)    | -0.097       | -0.068       | -0.071 | -0.099 | <b>-0.097</b> |
|        | MSE             | 0.286        | 0.272        | 0.127  | 0.238  | <b>0.161</b>  |
|        | R <sub>xy</sub> | 0.927        | 0.935        | 0.964  | 0.938  | <b>0.959</b>  |
|        | SNR (1.116)     | 1.035        | <b>1.130</b> | 1.108  | 1.128  | 1.129         |
| SS2    | MSE             | 0.353        | <b>0.085</b> | 0.134  | 0.093  | 0.109         |
|        | R <sub>xy</sub> | 0.987        | <b>0.997</b> | 0.995  | 0.996  | 0.996         |

\*: In Table 2–3, the true SNR values of SS1 and SS2 series are -0.096 and 1.116, respectively.

\*\*.: In all Tables, “SNR” means signal-to-noise ratio, “MSE” means mean square error, and “R<sub>xy</sub>” means the cross-correlation coefficient between series x and y.  
doi:10.1371/journal.pone.0110733.t002

**Table 3.** Evaluation of the de-noising results of SS1 and SS2 series obtained by different decomposition levels.

| Series | Index           | Decomposition level used |       |       |              |              |        |        |        |        |
|--------|-----------------|--------------------------|-------|-------|--------------|--------------|--------|--------|--------|--------|
|        |                 | 1                        | 2     | 3     | 4            | 5            | 6      | 7      | 8      | 9      |
| SS1    | SNR             | 0.384                    | 0.151 | 0.041 | -0.020       | -0.097       | -0.097 | -0.097 | -0.097 | -0.097 |
|        | MSE             | 1.054                    | 0.549 | 0.290 | 0.241        | <b>0.161</b> | 0.161  | 0.161  | 0.161  | 0.161  |
|        | R <sub>xy</sub> | 0.802                    | 0.881 | 0.932 | 0.935        | <b>0.959</b> | 0.959  | 0.959  | 0.959  | 0.959  |
| SS2    | SNR             | 1.451                    | 1.232 | 1.156 | <b>1.130</b> | 1.130        | 1.130  | 1.130  | 1.130  | 1.130  |
|        | MSE             | 0.551                    | 0.242 | 0.102 | <b>0.085</b> | 0.085        | 0.085  | 0.085  | 0.085  | 0.085  |
|        | R <sub>xy</sub> | 0.980                    | 0.991 | 0.996 | <b>0.997</b> | 0.997        | 0.997  | 0.997  | 0.997  | 0.997  |

doi:10.1371/journal.pone.0110733.t003

**Table 4.** Evaluation of the de-noising results of synthetic series in two types by the energy-based wavelet de-noising method proposed.

| Index*          | Type-I |        |        |        | Type-II |        |        |        |
|-----------------|--------|--------|--------|--------|---------|--------|--------|--------|
|                 | SS1    | SS12   | SS13   | SS14   | SS2     | SS22   | SS23   | SS24   |
| R <sub>t</sub>  | 0.416  | 0.027  | -0.007 | -0.041 | 0.924   | 0.137  | 0.110  | -0.005 |
| True SNR        | -0.096 | -1.770 | -3.132 | -3.742 | 1.116   | -0.891 | -2.235 | -4.248 |
| Calculated SNR  | -0.097 | -1.391 | -1.241 | -1.395 | 1.130   | -0.856 | -1.261 | -1.851 |
| MSE             | 0.161  | 3.586  | 130.44 | 375.29 | 0.085   | 4.097  | 53.508 | 330.6  |
| R <sub>xy</sub> | 0.959  | 0.441  | 0.179  | 0.284  | 0.997   | 0.857  | 0.299  | 0.170  |

\*: "R<sub>t</sub>" means lag-1 autocorrelation coefficient.  
doi:10.1371/journal.pone.0110733.t004



**Table 5.** De-noising results of synthetic series by the energy-based wavelet de-noising method proposed and the wavelet threshold de-noising (WTD) method.

| Series | Method used* | SNR        |                  | MSE    | R <sub>xy</sub> |
|--------|--------------|------------|------------------|--------|-----------------|
|        |              | true value | Calculated value |        |                 |
| SS1    | WTD          | -0.096     | -0.086           | 0.147  | 0.972           |
|        | New method   | -0.096     | -0.097           | 0.161  | 0.959           |
| SS12   | WTD          | -1.770     | -1.259           | 4.853  | 0.386           |
|        | New method   | -1.770     | -1.391           | 3.586  | 0.441           |
| SS13   | WTD          | -3.132     | -1.135           | 159.81 | 0.156           |
|        | New method   | -3.132     | -1.241           | 130.44 | 0.179           |
| SS2    | WTD          | 1.116      | 1.131            | 0.084  | 0.997           |
|        | New method   | 1.116      | 1.130            | 0.085  | 0.997           |
| SS22   | WTD          | -0.891     | -0.694           | 5.016  | 0.871           |
|        | New method   | -0.891     | -0.856           | 4.097  | 0.857           |
| SS23   | WTD          | -2.235     | -1.194           | 131.06 | 0.261           |
|        | New method   | -2.235     | -1.261           | 53.508 | 0.299           |

\*: "New method" is the energy-based wavelet de-noising method proposed.  
doi:10.1371/journal.pone.0110733.t005

The energy-based wavelet de-noising method is just compared with WTD. Three indexes, namely SNR (signal-to-noise ratio), MSE (mean square error) and R<sub>xy</sub> (zero-order cross-correlation coefficient) in Eq. (7), are used to evaluate the de-noising results:

$$\begin{aligned}
 SNR &= 10 \times \log(\text{var}(S^{\sim})/\text{var}(N)) \\
 MSE &= \text{var}(S^{\sim} - S) \\
 R_{xy} &= \frac{\sum_n (S - \bar{S})(S^{\sim} - \bar{S}^{\sim})}{\sqrt{\text{var}(S - \bar{S})\text{var}(S^{\sim} - \bar{S}^{\sim})}} \quad (7)
 \end{aligned}$$

in which  $\bar{S}$  and  $\bar{S}^{\sim}$  are the mean of true series  $S$  and de-noised series  $S^{\sim}$ , respectively,  $N$  is the removed noise;  $\text{var}()$  means calculating variance. SNR value reflects noise content of a series. The difference between calculated and true SNR values can reflect the accuracy of de-noising result; MSE value can reflect the similar degree of two series at statistical view, and R<sub>xy</sub> value can reflect the similar degree of two series at correlation view. Smaller difference between calculated and true SNR, smaller MSE value and bigger R<sub>xy</sub> value indicate more similarity of two series. Since energy distributions of various noise types are just the same, the Gauss distributed noise is used here, and 95% confidence interval is estimated for uncertainty evaluation.

### Synthetic series analysis

Eight synthetic series in two types are analyzed (Table 1). Four series in type-I have the same length of 1500, and include the same damped period. Four series in type-II have the same length of 500, and include two same true periods of 50 and 200, and the same exponentially upward trend with the base of 1.005. These series include different noise content, and have different true SNR value. All series are analyzed by the proposed method and WTD using various wavelets and decomposition levels. De-noising results are discussed from four perspectives.

**Results by different wavelets.** The decomposition level 10 ( $\log_2 1500$ ) is used, and five wavelets ("db2", "db16", "sym5", "coif4" and "bior3.9") are used to remove noise in SS1 series by the proposed method. Energy distributions of SS1 series obtained

by five wavelets are depicted in Fig. 3(a), in which sub-signals under ten levels (Ls) are reconstructed by detail wavelet coefficients. When applying different wavelets to SS1 series, energies of those sub-signals after L6 overstep 95% confidence interval, although their values vary with the wavelet used. Therefore, these sub-signals are regarded as deterministic components, and their sum is the de-noised SS1 series. The same analyses are conducted to SS2 series using the decomposition level 8 ( $\log_2 500$ ) and five wavelets. As shown in Fig. 3(b), sub-signals of SS2 series after L5 obtained by any wavelet have the energies overstepping 95% confidence interval, so they are regarded as deterministic components, and their sum is the de-noised SS2 series.

The de-noised SS1 and SS2 series are compared with true series (Table 2). It clearly indicates that de-noising results of each series vary with the wavelet used. Comparatively, de-noising result of SS1 series by "bior3.9" is the best, because the calculated SNR value -0.097 is very close to the true SNR value -0.096. Although de-noising results of SS1 series by "db16" and "bior3.9" wavelets are similar to each other, the calculated SNR value -0.068 by the latter has big difference with the true SNR value -0.096. Therefore, "bior3.9" is chosen as the best wavelet for de-noising SS1 series. For SS2 series, "db16" is chosen as the most suitable wavelet, by which the calculated SNR value 1.123 is very close to the true SNR value 1.116, the MSE value is as little as 0.082, and the R<sub>xy</sub> value is as big as 0.997.

**Results by different decomposition levels.** The "bior3.9" and "db16" wavelets are chosen, and different decomposition levels are used for de-noising SS1 and SS2 series (Table 3). Along with the increase of decomposition level, more noise in original series is removed, and de-noising results are gradually close to true results. For SS1 series, when the decomposition level equals 5 or bigger values, its de-noising results do not change. For SS2 series, its de-noising results obtained by level 4 or bigger levels are also the same. To sum up, the suitable decomposition level for de-noising does not equal the theoretically biggest level of  $\log_2 n$ , but just is the one which can identify series' deterministic sub-signal under the smallest temporal scale.

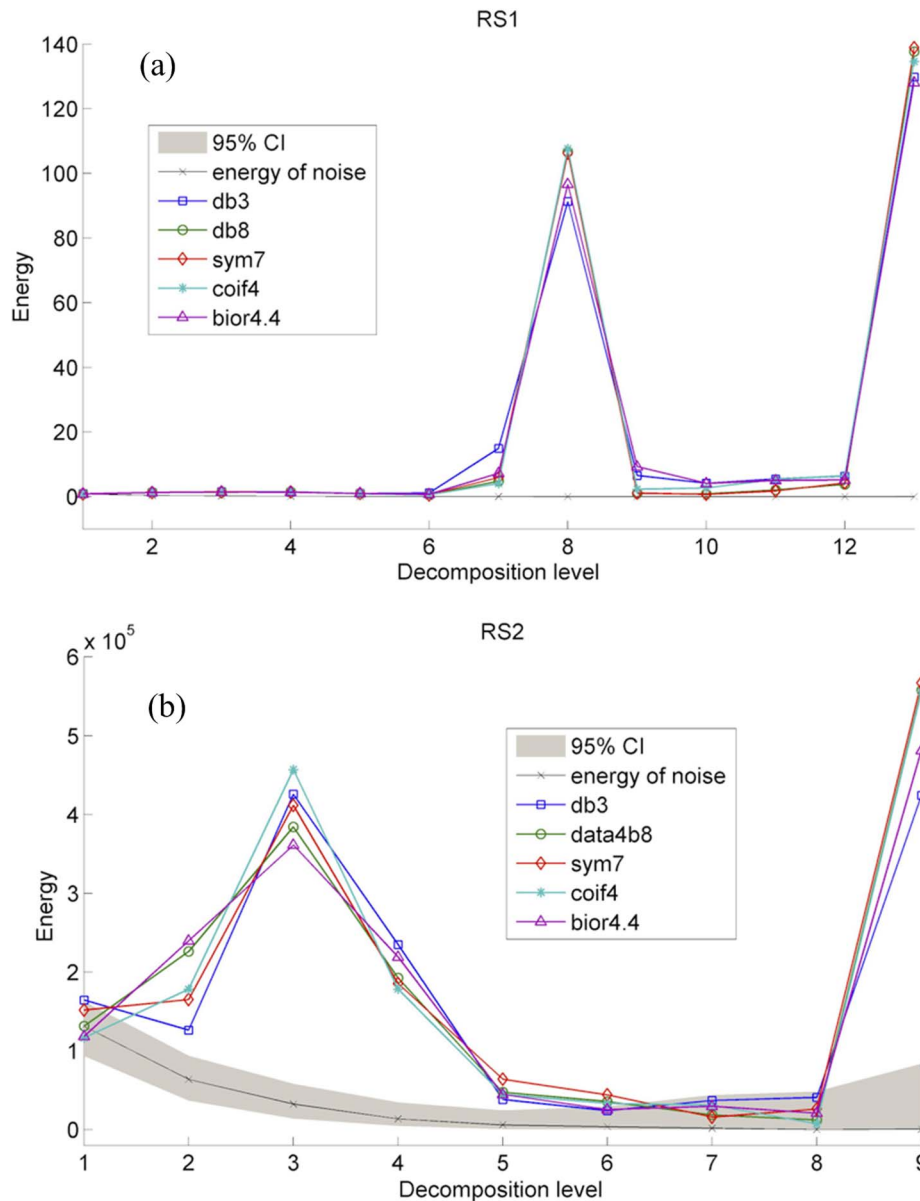

**Figure 4. Energy distributions of RS1 (a) and RS2 (b) series obtained by different wavelets.**  
doi:10.1371/journal.pone.0110733.g004

**De-noising results of various series.** According to the above result, the “bior3.9” wavelet and decomposition level 5 are used for de-noising type-I series, and the “db16” wavelet and decomposition level 4 are used for de-noising type-II series. De-noising results of all series by the proposed method are shown in Table 4. Along with noise content increase, true signals are gradually submerged by noise, so it becomes more difficult to accurately remove noise. Taking the type-I series for example, when just a little noise included, the SS1 series with the true SNR value  $-0.096$  can be de-noised accurately; when the SNR value decreases to  $-1.770$ , de-noising result of SS12 series becomes much bad, the MSE value is as big as 3.586, and the  $R_{xy}$  value is reduced to 0.441. When more noise is included, the SNR values of SS13 and SS14 series are smaller than  $-3.000$ , their MSE values are bigger than 130, and their  $R_{xy}$  values are smaller than 0.300, so accurate de-noising results of SS13 and SS14 series cannot be

obtained by the proposed method. The same finding can be obtained from de-noising results of type-II series.

**Results by the proposed method and WTD.** De-noising results of eight series by both the proposed method and WTD are presented in Table 5. Because SS14 and SS24 series are contaminated by noise severely, they are not considered here. On the whole, de-noising results of all series by the two methods are similar to each other. For SS1 series example, the SNR, MSE and  $R_{xy}$  values obtained by the proposed method are  $-0.097$ , 0.161 and 0.959, and those obtained by WTD are similar as  $-0.086$ , 0.147 and 0.972. Therefore, it is thought that the energy-based wavelet de-noising method has comparable power as WTD in de-noising of series.

Comparatively, de-noising process by the proposed method can be conducted following the steps in Fig. 2, and it need not handle wavelet coefficients, so is more practical and easier to be operated than WTD. Moreover, uncertainty of de-noising result can also be



**Table 6.** Evaluation of the de-noising results of RS1 and RS2 series obtained by different wavelets.

| Series | Index*         | Wavelet used |              |       |       |         |
|--------|----------------|--------------|--------------|-------|-------|---------|
|        |                | db3          | db8          | sym7  | coif4 | bior4.4 |
| RS1    | SNR            | 1.742        | <b>1.742</b> | 1.749 | 1.751 | 1.740   |
|        | MSE            | 2.168        | <b>2.167</b> | 2.133 | 2.124 | 2.177   |
|        | $R_{xy}$       | 0.991        | <b>0.991</b> | 0.991 | 0.991 | 0.991   |
| RS2    | SNR            | 0.732        | <b>0.844</b> | 0.776 | 0.906 | 0.900   |
|        | MSE ( $10^5$ ) | 1.651        | <b>1.318</b> | 1.523 | 1.169 | 1.188   |
|        | $R_{xy}$       | 0.913        | <b>0.934</b> | 0.922 | 0.942 | 0.941   |

\*: In Table 6–7, MSE and  $R_{xy}$  are used to compare original series and the de-noised series.  
doi:10.1371/journal.pone.0110733.t006

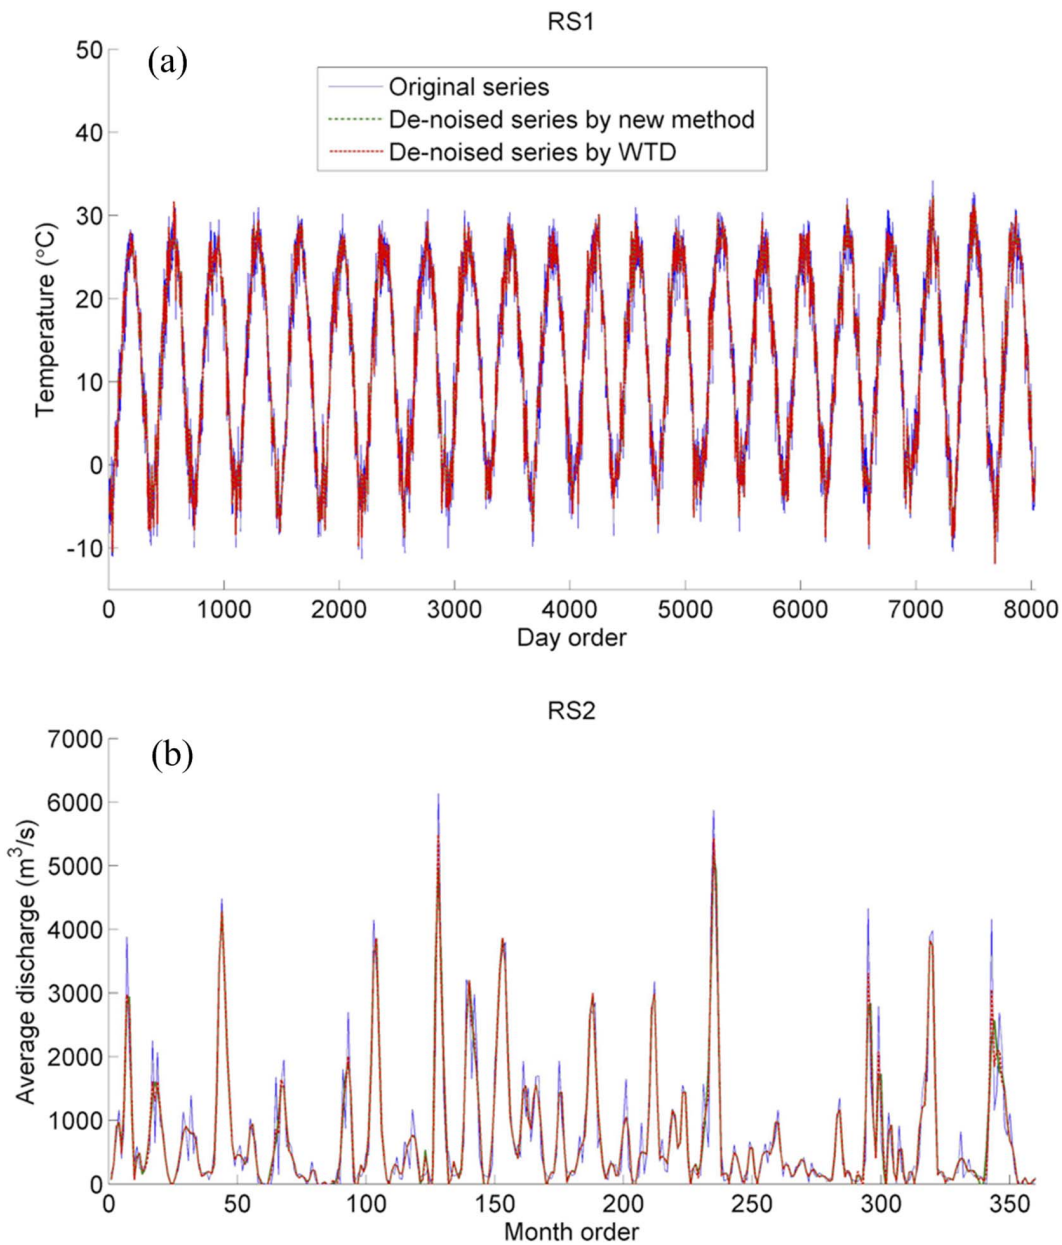

**Figure 5.** De-noising results of RS1 (a) and RS2 (b) series by the energy-based wavelet de-noising method (the new method) and the wavelet threshold de-noising (WTD) method.  
doi:10.1371/journal.pone.0110733.g005

**Table 7.** Evaluation of the de-noising results of RS1 and RS2 series obtained by different decomposition levels.

| Series | Index          | Decomposition level used |              |       |       |       |       |       |       |       |       |       |       |       |
|--------|----------------|--------------------------|--------------|-------|-------|-------|-------|-------|-------|-------|-------|-------|-------|-------|
|        |                | 1                        | 2            | 3     | 4     | 5     | 6     | 7     | 8     | 9     | 10    | 11    | 12    |       |
| RS1    | SNR            | 2.171                    | <b>1.742</b> | 1.742 | 1.742 | 1.742 | 1.742 | 1.742 | 1.742 | 1.742 | 1.742 | 1.742 | 1.742 | 1.742 |
|        | MSE            | 0.815                    | <b>2.167</b> | 2.167 | 2.167 | 2.167 | 2.167 | 2.167 | 2.167 | 2.167 | 2.167 | 2.167 | 2.167 | 2.167 |
|        | $R_{xy}$       | 0.997                    | <b>0.991</b> | 0.991 | 0.991 | 0.991 | 0.991 | 0.991 | 0.991 | 0.991 | 0.991 | 0.991 | 0.991 | 0.991 |
| RS2    | SNR            | <b>0.844</b>             | 0.844        | 0.844 | 0.844 | 0.844 | 0.844 | 0.844 | 0.844 | 0.844 | 0.844 | 0.844 | 0.844 | 0.844 |
|        | MSE ( $10^5$ ) | <b>1.318</b>             | 1.318        | 1.318 | 1.318 | 1.318 | 1.318 | 1.318 | 1.318 | 1.318 | 1.318 | 1.318 | 1.318 | 1.318 |
|        | $R_{xy}$       | <b>0.934</b>             | 0.934        | 0.934 | 0.934 | 0.934 | 0.934 | 0.934 | 0.934 | 0.934 | 0.934 | 0.934 | 0.934 | 0.934 |

doi:10.1371/journal.pone.0110733.t007

estimated by the proposed method using 95% confidence interval, but WTD method cannot do this.

**Observed series analysis**

Two observed hydrologic series (RS1 and RS2) are analyzed to further verify the performance of the proposed method. RS1 series presents 22-year (1980–2001) daily average temperature data measured at the Beijing weather station, and it has a dominant annual period due to the annual variability of climatic process. RS2 series presents 30-year (1972–2001) monthly average runoff discharge data measured at the Bengbu hydrologic station in the Huai River in East China, and it has a dominant period of 12 months also due to the annual variability of hydrologic process. Lag-1 autocorrelation coefficients of two series are 0.981 and 0.647 respectively, indicating good autocorrelation. Therefore, the two series are not severely contaminated by noise, and their deterministic components can be identified.

The two observed series are analyzed by the proposed method using five wavelets (“db3”, “db8”, “sym7”, “coif4”, and “bior4.4”). Results in Fig. 4 clearly indicate that energy distributions of series vary with the wavelets used. Energies of RS1 series’ sub-signals under L3, L4, L5, L7, L8, L9, L10, L11, and L12 obtained by any of the five wavelets overstep 95% confidence interval, so their sum is the de-noised RS1 series. The sub-signals of RS2 series under L2, L3, L4, L5, L6 and L9 have the energies overstepping 95% confidence interval, and their sum is the de-noised RS2 series. Results in Table 6 indicate that de-noising results of RS1 series by five wavelets are similar, but de-noising results of RS2 series by five wavelets show big difference. It is due to more complex variation of RS2 series as shown in Fig. 5. As a result, the “db8” wavelet is chosen for de-noising of RS1 and RS2 series.

De-noising results of two observed series using different decomposition levels are presented in Table 7. De-noising results of RS1 series using decomposition level 2 or bigger levels are the same. De-noising results of RS2 series using any decomposition level are the same. Because the decomposition levels of 2 and 1 just correspond to the sub-signals which reflect the two observed series’ dominant characteristics (*i.e.*, dominant annual period of 12 months), it holds that the de-noising results are reasonable.

The two observed series are also de-noised by WTD (Fig. 5). The calculated SNR values of RS1 and RS2 series obtained by the proposed method are 1.742 and 0.844, and those by WTD are similar as 1.763 and 1.045, being similar with each other. Moreover, de-noised series also have no big difference with original series because of just a little noise included, further indicating the comparable power of the proposed method and WTD.

**Results Discussion**

De-noising is an important but difficult task in hydrologic series analysis. By exploiting the advantage of wavelet analysis, an energy-based wavelet de-noising method was proposed in the paper. The influences of three key factors on its efficiency were discussed using various examples. By discussing all results, the following understandings can be gained:

- (1) Influence of wavelet. Wavelet choice is the foremost task in wavelet analysis [29] – [30], also including wavelet de-noising. When using the energy-based wavelet de-noising method to analyze series, energy distribution and de-noising result of series would vary with the wavelet used. For those synthetic series used in this paper, the most suitable wavelets can be

chosen based on de-noising result. However, deterministic components in observed hydrologic data are unknown, so proper wavelet cannot be chosen easily. Here, the criteria proposed in the literature [9] were recommended to choose proper wavelet. The criteria can take the composition and statistical characters of series into account, so they are reliable and useful.

- (2) Influence of decomposition level. Decomposition level choice is a key factor in discrete wavelet analysis, so it influences wavelet de-noising. Analyses of all series indicate that the most appropriate decomposition level for wavelet de-noising is the one which can identify series' deterministic sub-signal under the smallest scale. If using bigger levels, de-noising results are just the same, but de-noising process would be more time-consuming. Furthermore, the proper decomposition level for energy-based wavelet de-noising is just determined by the composition of the analyzed series, so the chosen decomposition level is reliable, by which de-noising result can be more reasonable.
- (3) Influence of noise content. Noise type has no influence on the shape of background energy distribution, but noise content in a series determines the magnitude of background energy distribution and confidence interval. Generally, when a series includes too much noise, its deterministic components would be submerged by noise, and energy values of all sub-signals would fall within the estimated confidence interval, so no deterministic component could be identified by the proposed method or WTD. However, for those series which are contaminated severely by noise, they usually show pure random but not good autocorrelation; for instance, the lag-1 autocorrelation coefficient ( $R_1$ ) of SS13 and SS14 series is as small as  $-0.007$  and  $-0.041$ . Therefore, it need not identify deterministic components in these cases; we can regard them as random series, and use proper statistical methods to describe their statistical characters.
- (4) Effectiveness of the proposed method. The WTD method used commonly is based on wavelet coefficient thresholding, so its effectiveness is influenced not only by wavelet and decomposition level choice, but also by threshold estimation and coefficient thresholding [19]. Differing from the WTD method, the wavelet de-noising method proposed is based on energy distribution of series, so it has more reliable physical

basis. By using it deterministic component of certain series under each level can be identified and separated, and uncertainty can also be estimated. Furthermore, de-noising process by the proposed method can be more easily operable following the steps in Fig. 2.

## Conclusions

In this paper, Monte-Carlo test was operated to estimate energy distribution of noise, and a reliable background energy distribution was established. By comparing energy distribution of series with the background energy distribution, an energy-based wavelet de-noising method was proposed. Its effectiveness and applicability were verified by discussing the influences of three key factors. Results of both synthetic and observed series indicate comparable power of the proposed method as WTD. However, wavelet choice and decomposition level choice should be carefully considered when using the proposed method, and effective methods should be further studied to solve the problem. Those suggestions given above can be used to handle the problem. In addition, we can firstly evaluate autocorrelation of a series. If showing good autocorrelation, the series can be de-noised by the proposed method or other de-noising methods. However, if showing pure random characters, the series can be regarded as a random series, but need not to be de-noised. Further studies using more observed data from other study areas may be required to strengthen the applicability of the energy-based wavelet de-noising method proposed.

## Acknowledgments

The authors gratefully acknowledged the valuable comments and suggestions on earlier version of the manuscript given by the Academic Editor, Alejandro Raul Hernandez Montoya, and two reviewers. The authors also thanked Ms. Feifei Liu for her assistance in the preparation of the manuscript.

## Author Contributions

Conceived and designed the experiments: YFS. Performed the experiments: YFS. Analyzed the data: YFS ZW CL JW LYS. Contributed reagents/materials/analysis tools: YFS ZW CL JW LYS. Wrote the paper: YFS.

## References

1. Koutsoyiannis D, Montanari A (2007) Statistical analysis of hydroclimatic time series: Uncertainty and insights. *Water Resour Res* 43: W05429.
2. Ravines RR, Schmidt AM, Migon HS, Renno CD (2008) A joint model for rainfall-runoff: the case of Rio Grande Basin. *J Hydrol* 353: 189–200.
3. Schreiber T (1993) Extremely simple nonlinear noise-reduction method. *Physical Review*, E 47: 2401–2404.
4. Sang YF, Wang D, Wu JC (2010) Entropy-Based Method of Choosing Decomposition Level in Wavelet Threshold De-noising. *Entropy* 12: 1499–1513.
5. Montanari A, Brath A (2004) A stochastic approach for assessing the uncertainty of rainfall-runoff simulations. *Water Resour Res* 40: W01106.
6. Garfias-Soliz J, Llanos-Acebo H, Martel R (2010) Time series and stochastic analyses to study the hydrodynamic characteristics of karstic aquifers. *Hydrol Process* 24: 300–316.
7. Ding J, Deng YR (1988) *Stochastic Hydrology*. The publisher of the Science and Technology University of Chengdu, Chengdu China. (in Chinese)
8. Yevjevich V (1972) *Stochastic Process in Hydrology*. Water Resources Publications, Colorado.
9. Sang YF, Wang D, Wu JC, Zhu QP, Wang L (2009) Entropy-based wavelet de-noising method for time series analysis. *Entropy* 11: 1123–1147.
10. Jain A, Kumar AM (2007) Hybrid neural network models for hydrologic time series forecasting. *Appl Soft Comput* 7: 585–592.
11. Sang YF (2013) Improved wavelet modeling framework for hydrologic time series forecasting. *Water Resour Manage* DOI: 10.1007/s11269-013-0316-1
12. Biemans H, Hutjes RWA, Kabat P, Strengers BJ, Gerten D, et al (2009) Effects of precipitation uncertainty on discharge calculations for Main River basins. *J Hydrometeorol* 10: 1011–1025.
13. Bormann H (2008) Sensitivity of a soil-vegetation-atmosphere-transfer scheme to input data resolution and data classification. *J Hydrol* 351: 154–169.
14. Elshorbagy A, Simonovic SP, Panu US (2002) Noise reduction in chaotic hydrologic time series: facts and doubts. *J Hydrol* 256: 147–165.
15. Jayawardena AW, Gurung AB (2000) Noise reduction and prediction of hydrometeorological time series: dynamical systems approach vs. stochastic approach. *J Hydrol* 228: 242–264.
16. Jansen M (2006) Minimum Risk Thresholds for data with heavy noise. *IEEE Signal Process Letter* 13: 296–299.
17. Antoniadis A, Bigot J, Sapatinas T (2001) Wavelet estimators in nonparametric regression: A comparative simulation study. *J Stat Softw* 6: 1–83.
18. Percival DB, Walden AT (2000) *Wavelet Methods for Time Series Analysis*. Cambridge University Press, Cambridge, UK.
19. Donoho DH (1995) De-noising by soft-thresholding. *IEEE Transact Inform Theory*, 41: 613–627.
20. Bruni V, Vitulano D (2006) Wavelet-based signal de-noising via simple singularities approximation. *Signal Process* 86: 859–876.
21. Danbechins I (1992) *Ten Lectures on Wavelets*. SIAM, Philadelphia, PA.
22. Masry E (1993) The wavelet transform of stochastic processes with stationary increments and its application to fractional Brownian motion. *IEEE T Inform Theory* 39: 260–264.

23. Labat D, Ababou R, Mangin A (2000) Rainfall-runoff relations for karstic springs. Part II: Continuous wavelet and discrete orthogonal multiresolution analyses. *J Hydrol* 238: 149–178.
24. Chanerley AA, Alexander NA (2007) Correcting data from an unknown accelerometer using recursive least squares and wavelet de-noising. *Comput Struct* 85: 1679–1692.
25. Sang YF, Wang D, Wu JC (2011) Comparison of the Wavelet Characters of Various Noises by Discrete Wavelet Transform. *IAHS Publ* 350: 622–626.
26. Mallat S (1989) A theory for multiresolution signal decomposition: The wavelet representation. *IEEE T Pattern Intell* 11: 674–693.
27. Wornell GW (1993) Wavelet-based representations for the  $1/f$  family of fractal processes. *Proceed IEEE* 81: 1428–1450.
28. Sang YF (2012) A practical guide to discrete wavelet decomposition of hydrologic time series. *Water Resour Manage* 26: 3345–3365.
29. Torrence C, Compo GP (1998) A practical guide to wavelet analysis. *Bull Amer Meteor Soc* 79: 61–78.
30. Walker JS (1999) *A Primer on Wavelets and their Scientific Applications*. Chapman and Hall, CRC, New York.
